# Supplementary material for: A new way to enhance the porosity and Y-faujasite percentage of in situ crystallized FCC catalyst
Source: Royal Society of Chemistry journal article supplement (doi:10.1039/c1cy00305d), 2011-12-23
Supplement: c1cy00305d.pdf [file c1cy00305d.pdf]

# A new way to enhance porosity and Y-faujasite percentage of *in-situ* crystallized FCC catalyst

Yongming Zhang<sup>a,b</sup>, Chunrong Xiong<sup>a</sup> \*

<sup>a</sup> Key Laboratory of Ministry of Education for Application Technology of Chemical Materials in Hainan Superior Resources, Hainan University, Haikou 570228, P. R. China.

<sup>b</sup> Key Laboratory of Petrochemical Detecting Techniques of Hainan Province, hainan570228, P. R. China.

## Supplement Information

**Table S1** Chemical composition and properties of the kaolin clay

| <b>Index</b>                         | <b>Value</b> |
|--------------------------------------|--------------|
| <b>Chemical composition:</b>         |              |
| H <sub>2</sub> O(wt%)                | 14.45        |
| Al <sub>2</sub> O <sub>3</sub> (wt%) | 37.36        |
| SiO <sub>2</sub> (wt%)               | 46.69        |
| Na <sub>2</sub> O(wt%)               | 0.16         |
| K <sub>2</sub> O(wt%)                | 0.24         |
| Fe <sub>2</sub> O <sub>3</sub> (wt%) | 0.40         |
| TiO <sub>2</sub> (wt%)               | 0.28         |
| <b>XRD phases:</b>                   |              |
| Kaolin (wt%)                         | 86           |
| Quartz (wt%)                         | 0.5          |
| <b>Size distributions:</b>           |              |
| D(v,10)(μm)                          | 1.94         |
| D(v,50)(μm)                          | 3.33         |
| D(v,90)(μm)                          | 6.03         |
| D(v,98)(μm)                          | 9.40         |

**Table S2** Properties and composition of the mixed FCC feedstock

|                                     | <b>Vacuum gas oil<br/>(VGO)</b> | <b>Vacuum tower<br/>bottom (VTB)</b> |
|-------------------------------------|---------------------------------|--------------------------------------|
| Average molecular weight            | 418                             | 988                                  |
| Density (g·cm <sup>-3</sup> , 20°C) | 0.8726                          | 0.9182                               |
| Solidifying point (°C)              | 47                              | –                                    |
| Carbon residue                      |                                 | 7.73                                 |
| <b>Composition (%)</b>              |                                 |                                      |
| Saturated hydrocarbon               | 75.2                            | 28.8                                 |
| Aromatics                           | 19.2                            | 39.5                                 |
| Colloidal hydrocarbons              | 5.5                             | 30.7                                 |
| Asphaltine                          | 0.1                             | 1                                    |
| <b>Elements (%)</b>                 |                                 |                                      |
| C                                   | 86.61                           | 86.97                                |
| H                                   | 13.77                           | 12.8                                 |
| S                                   | 0.21                            | 0.26                                 |
| N                                   | 0.083                           | 0.37                                 |
| Basic nitrogen (ppm)                | 296                             | 1970                                 |
| <b>Metal contents (ppm)</b>         |                                 |                                      |
| Ni                                  | 0.2                             | 8                                    |
| V                                   | <0.1                            | 0.1                                  |
| <b>Distillation (°C)</b>            |                                 |                                      |
| Initial                             | 312                             | 424                                  |
| 10%                                 | 400                             |                                      |
| 50%                                 | 454                             |                                      |
| 90%                                 | 515                             |                                      |

**Table S3** Chemical composition, physical properties and size distribution of the catalyst CAT-1 and CAT-0

| Catalysts                               | CAT-1 | CAT-0 |
|-----------------------------------------|-------|-------|
| Al <sub>2</sub> O <sub>3</sub> (wt%)    | 39.75 | 38.56 |
| SiO <sub>2</sub> (wt%)                  | 53.49 | 53.92 |
| Fe <sub>2</sub> O <sub>3</sub> (wt%)    | 0.16  | 0.21  |
| La <sub>2</sub> O <sub>3</sub> (wt%)    | 5.84  | 5.57  |
| Na <sub>2</sub> O (wt%)                 | 0.33  | 0.3   |
| Attrition Index (wt %·h <sup>-1</sup> ) | 2.2   | 2.0   |
| P.V. (mL·g <sup>-1</sup> )              | 0.48  | 0.36  |
| S.A.(m <sup>2</sup> ·g <sup>-1</sup> )  | 410   | 297   |
| <b>Size distribution</b>                |       |       |
| <40μm (V%)                              | 19.6  | 18.8  |
| 40–110μm (V%)                           | 64.7  | 64.4  |
| >110μm (V%)                             | 15.7  | 16.8  |

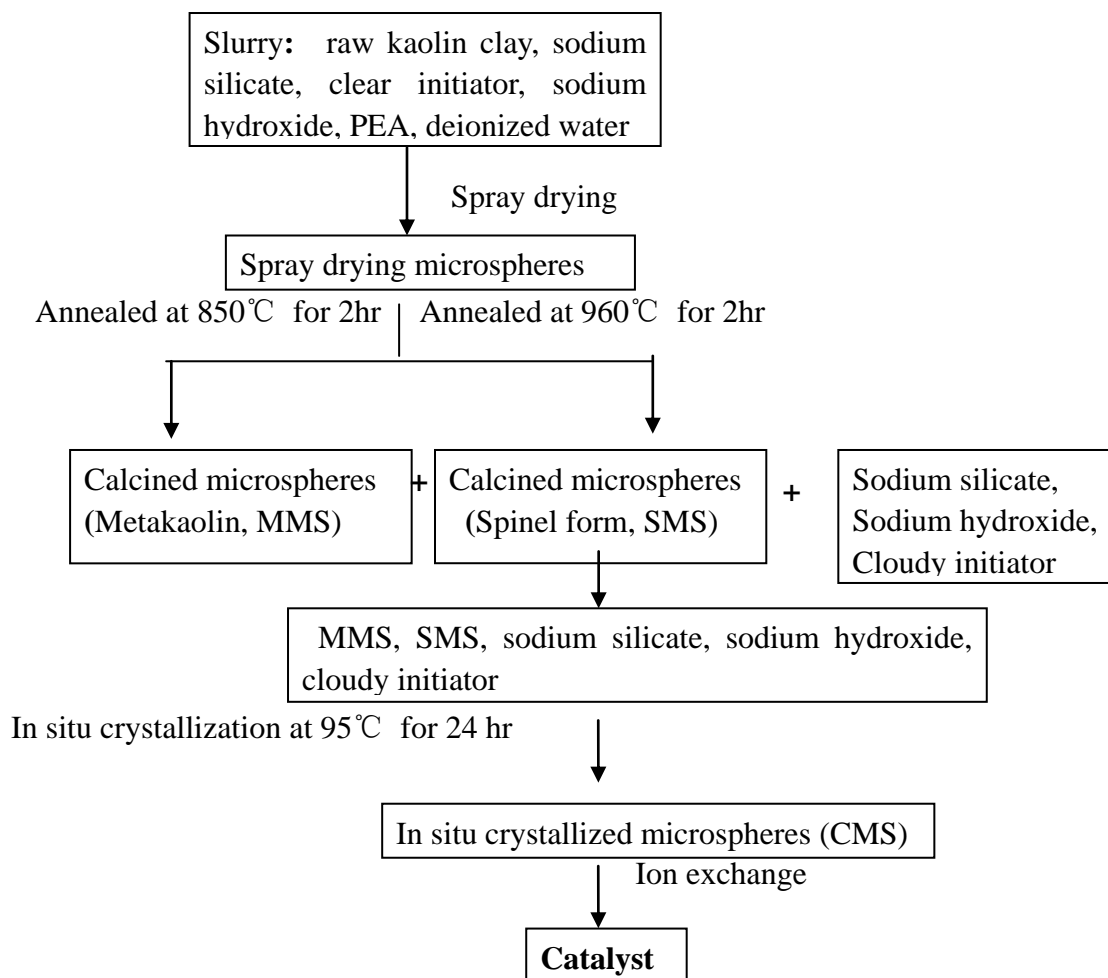

**Fig. S1** Schematic diagram of the typical synthesis procedure of the *in-situ* crystallized FCC catalyst.

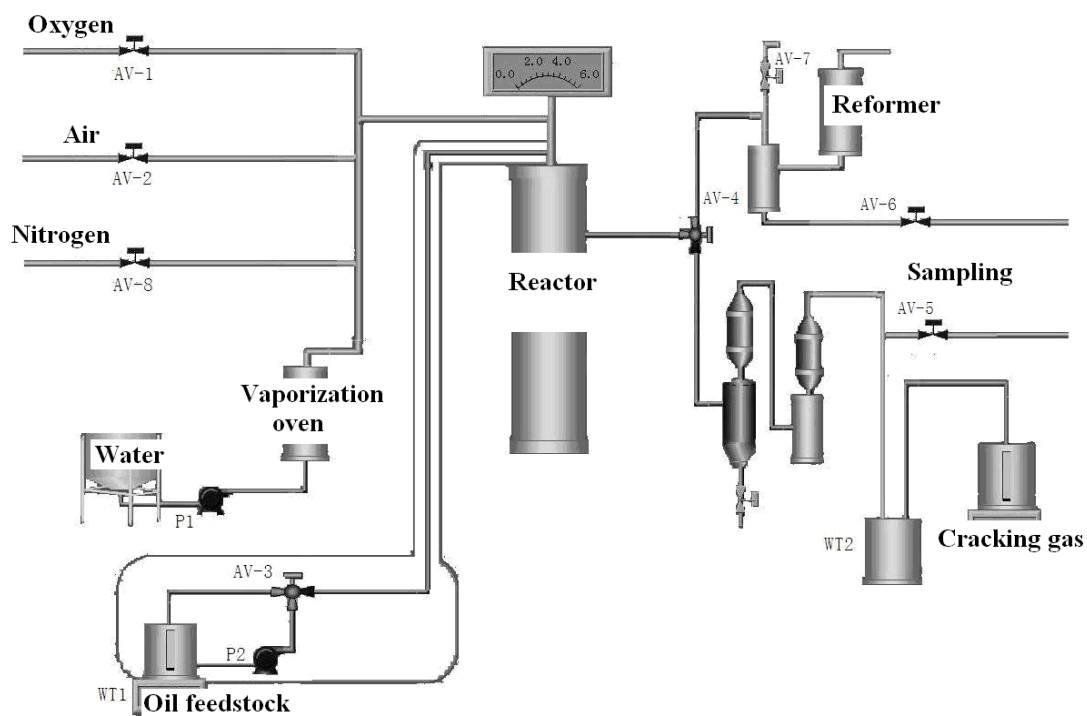

**Fig. S2** Schematic diagram of the fixed fluiding bed.

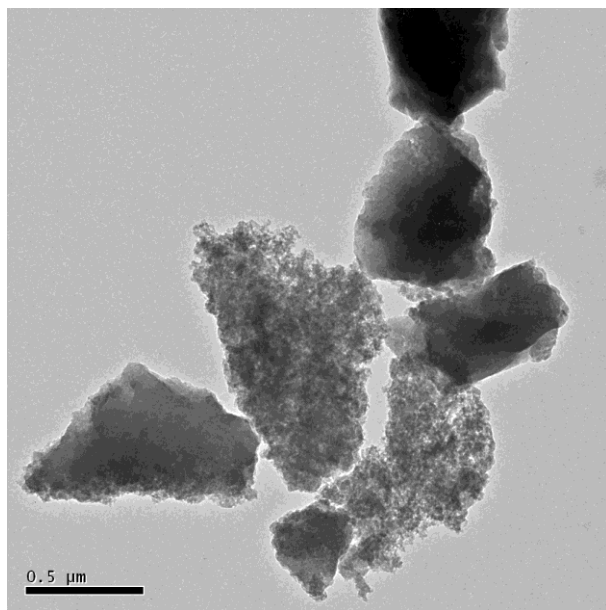

**Fig. S3** TEM image of the physically and chemically treated coconut shell.

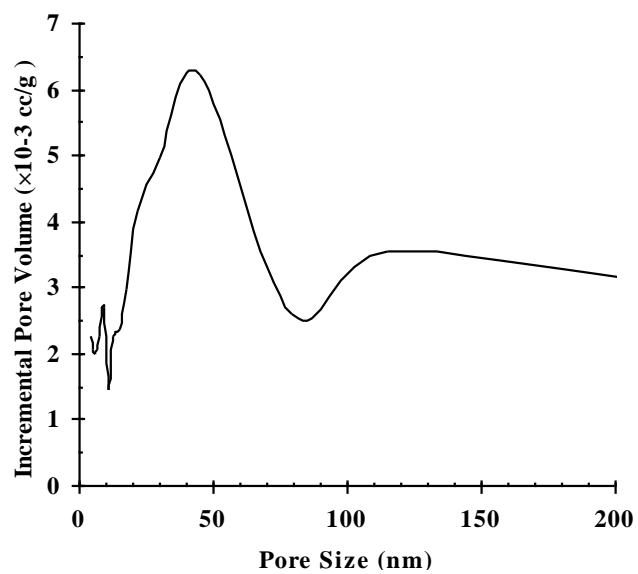

**Fig. S4** The pore size distribution of the pretreated coconut shell.

## Attrition index testing

Attrition index were determined by “Tube Attrition Tester” as shown in Figure S4. The samples (i.e. micro spheres) to be tested were dried at 350°C for 30min, then cooled down to room temperature. 10g of microspheres was placed in tube 1 of the tester. The moisture saturated air was compressed in tube 1 at a flowing velocity of  $20\text{L}\cdot\text{min}^{-1}$ , the microspheres in the tube 1 will fluidize and rub against each other or against the tube surface, producing powder due to attrition. The produced powder was blown into and then dropped down in tube 3 through tube 2. The remained sample in the tube 1 were carefully collected after 4h of running, dried at 350°C for 30min, then cooled down and weighted as  $W(\text{g})$ . The attrition index(AI) is expressed as

$$\text{AI} = \frac{W(\text{g})}{4W(0)} \times 100\% (\text{h}^{-1})$$

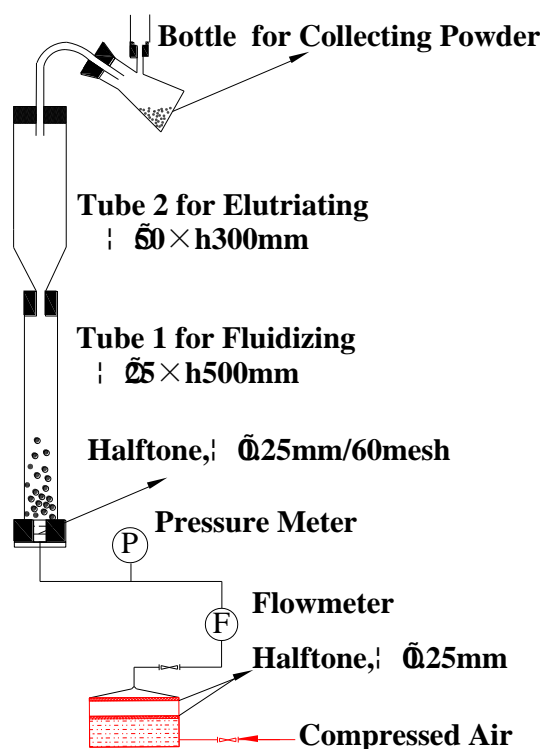

Fig. S5 Tube attrition tester



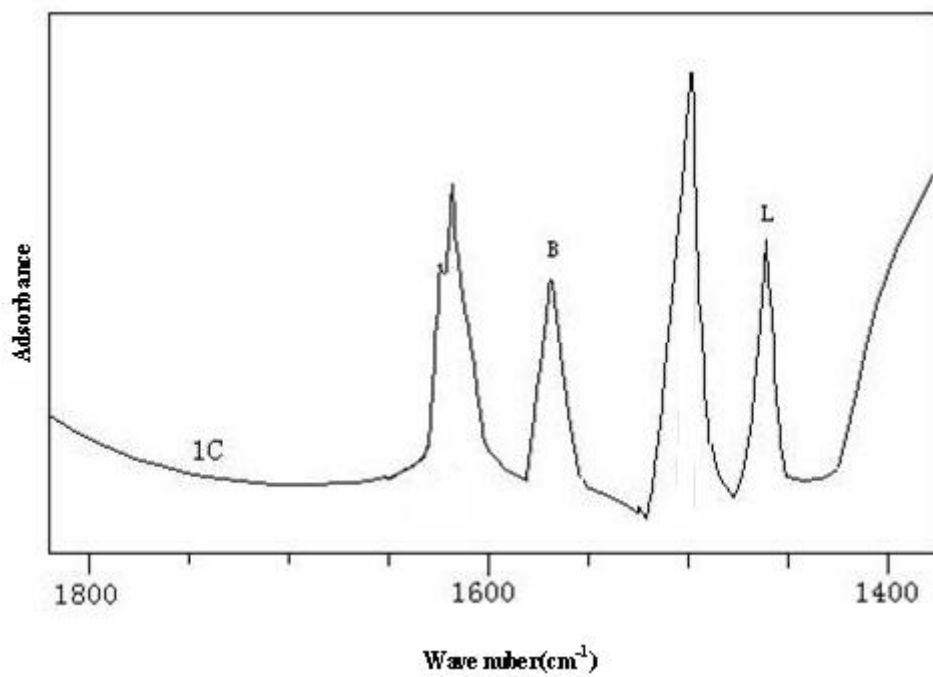

**Fig.S6** FT-IR spectra of pyridine adsorbed commercial catalyst CC-15 at 200°C.
